# Supplementary material for: Identifying HSV-1 Inhibitors from Natural Compounds via Virtual Screening Targeting Surface Glycoprotein D
Source: MDPI journal article supplement (doi:10.3390/ph15030361), 2022-03-16
Supplement: s1 [file s1]

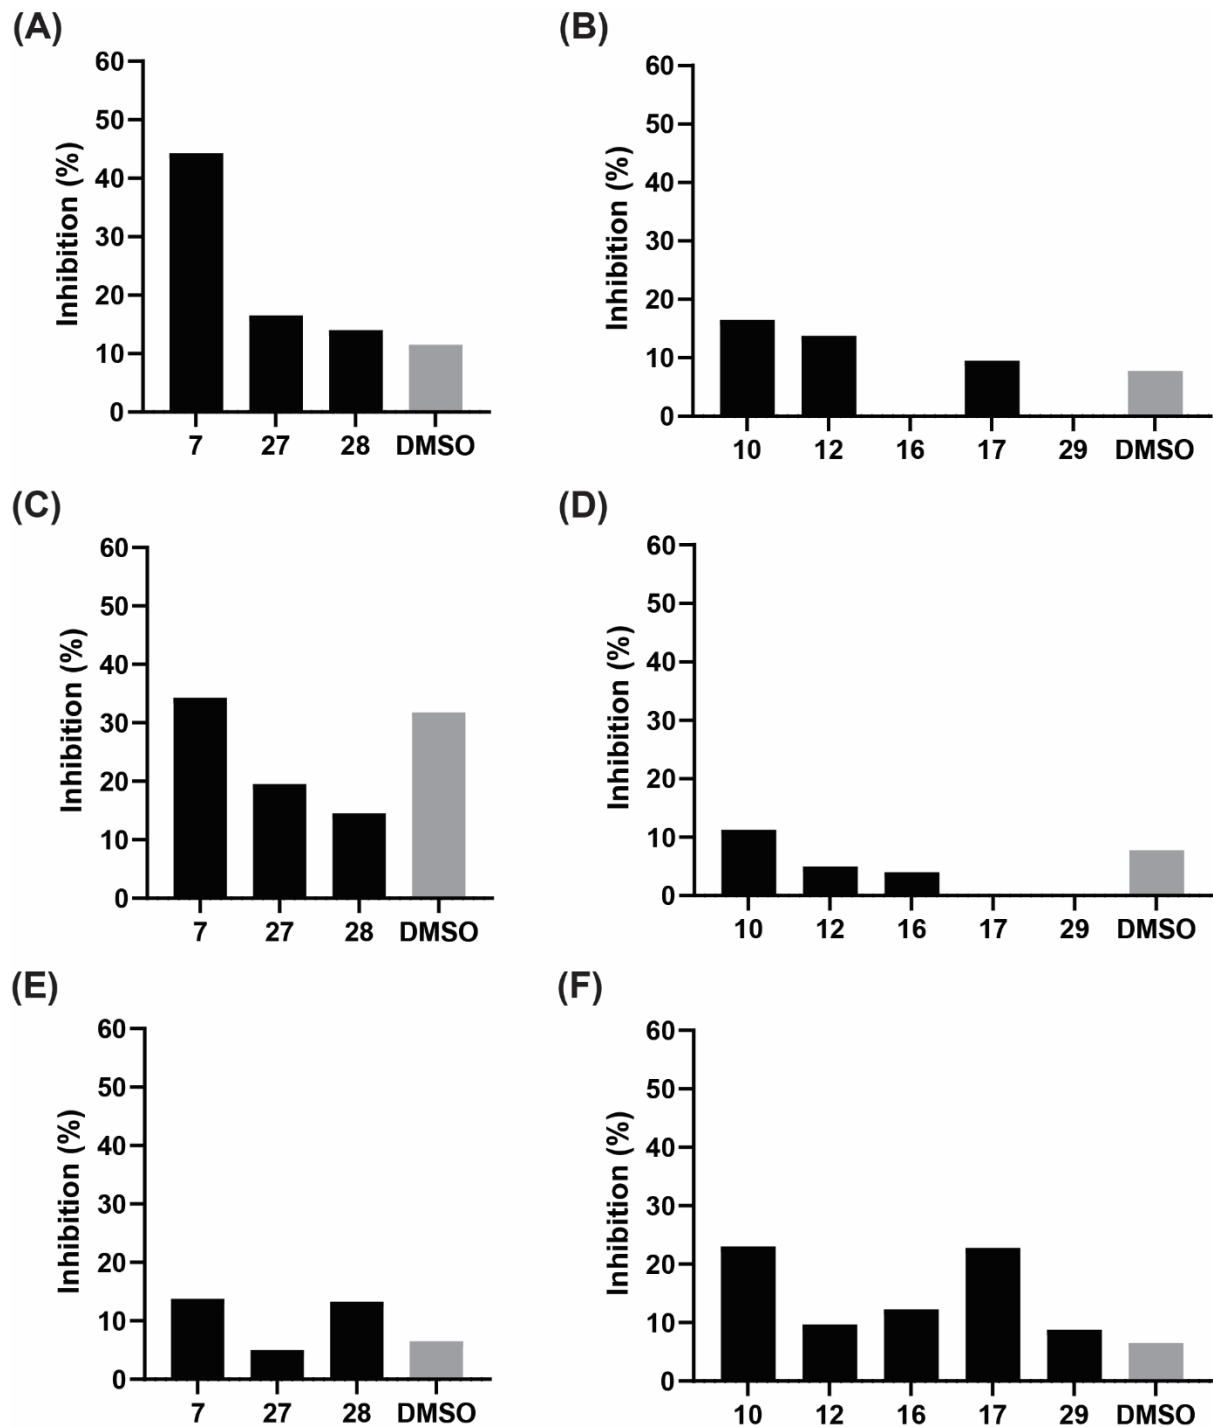

**Figure S1. Preliminary screening for antiviral activity of eight select active compounds**

The antiviral activity of active compounds (ACs) #7, #27 and #28 was tested at 10  $\mu\text{g/ml}$  at the viral inactivation stage (A), viral attachment and entry stage (C), and post-entry stage (E). ACs #10, #12, #16, #17 and #29 were tested at 1  $\mu\text{g/ml}$  in viral inactivation (B), attachment and entry (D) and post-entry (F) stages. The experiment was performed with Multiplicity of infection (MOI)=0.01 in four technical quadruplicates. Cells infected with the virus and treated with dimethyl sulfoxide (DMSO) corresponding to the concentration used for tested ACs were included as a solvent control. Plotted are the means of the technical quadruplicates.

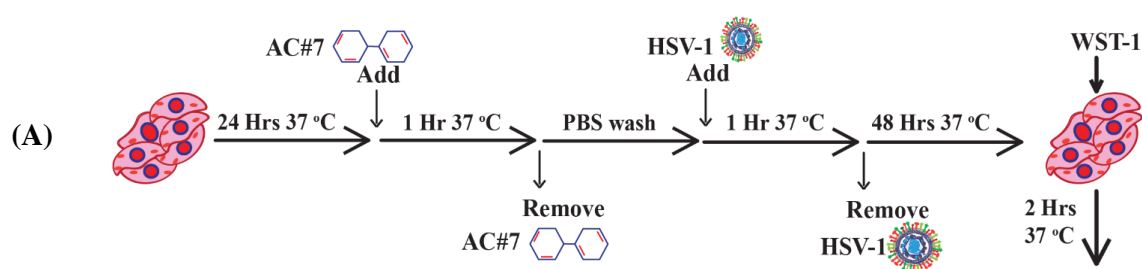

(B)

| Description     | Virus | DMSO       | AC#7     | Cell survival rate (%) | Inhibition (%) |
|-----------------|-------|------------|----------|------------------------|----------------|
| Cell control    | -     | -          | -        | 100%                   | -              |
| Viral control   | MOI=5 | -          | -        | 7.7%±0.9%              | -              |
| Solvent control | MOI=5 | 0.1% (v/v) | -        | 7.0%±0.3%              | 0%             |
| AC#7            | MOI=5 | 0.1% (v/v) | 10 µg/ml | 7.7%±1.2%              | 0%             |

**Figure S2. Investigating the antiviral activity of AC#7 when added to cells before Herpes Simplex Virus type 1 infection.**

The schematic diagram of the assay is illustrated in (A). AC#7 was added to a monolayer of African Green monkey kidney (VERO) cells one hour before infection at a final concentration of 10 µg/ml, containing 0.1% (v/v) dimethyl sulfoxide (DMSO). After one hour of incubation at 37 °C, 5% CO<sub>2</sub>, AC#7 was removed, and the cells were washed with phosphate-buffered saline (PBS). Then, the cells were infected with HSV-1 at the multiplicity of infection (MOI)=5. After removing the inoculum 1 hour post infection, the cells were incubated for another 48 hours at 37 °C, 5% CO<sub>2</sub>. Three controls listed in (B) were tested simultaneously. The experiment was performed in quadruplicates. The cells treated with AC#7 did not exhibit antiviral activity.

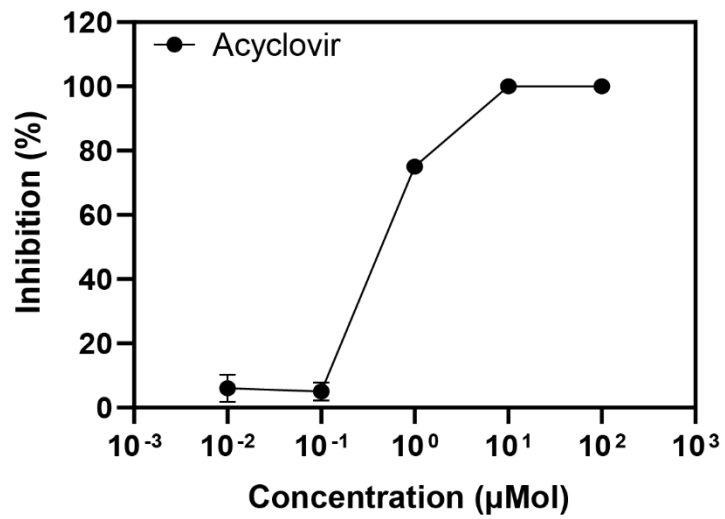

**Figure S3. Inhibition of antiviral activity by acyclovir in the post-entry stage**

As a positive control, the antiviral activity of acyclovir was investigated by plaque reduction assay in African Green monkey kidney cells at the post-entry stage. Acyclovir was tested at concentrations of 100 μMol, 10 μMol, 1 μMol, 0.1 μMol, and 0.01 μMol. The calculated half maximal effective concentration (EC<sub>50</sub>) of acyclovir in the post-entry stage was 0.77 μMol, ( $R^2 > 0.99$ ).
